# Supplementary material for: Data-Driven Derivation of Molecular Substructures That Enhance Drug Activity in Gram-Negative Bacteria
Source: PubMed Central journal article supplement (PMC9059115; doi:10.1021/acs.jmedchem.1c01984), 2022-04-15
Supplement: jm1c01984_si_003.pdf [file jm1c01984_si_003.pdf]

## Supporting Information

### Data-driven derivation of molecular substructures that enhance drug activity in Gram-negative bacteria

Dominik Gurvic<sup>a</sup>, Andrew G. Leach<sup>b, c</sup>, and Ulrich Zachariae<sup>a,\*</sup>

<sup>a</sup> Computational Biology, School of Life Sciences, University of Dundee, Dow Street, Dundee, DD1 5EH, United Kingdom.

<sup>b</sup> Division of Pharmacy and Optometry, University of Manchester, Oxford Road, Manchester, M13 9PL, United Kingdom.

<sup>c</sup> Medchemica Limited, Mereside, Alderley Park, Macclesfield, SK10 4TG, United Kingdom.

\*Corresponding author [u.zachariae@dundee.ac.uk](mailto:u.zachariae@dundee.ac.uk)

## Table of Contents

|                                                              |   |
|--------------------------------------------------------------|---|
| Synthetic Data Generation .....                              | 2 |
| Distributions of pMIC caused by transforms from Tab. 5 ..... | 3 |

## Synthetic Data Generation

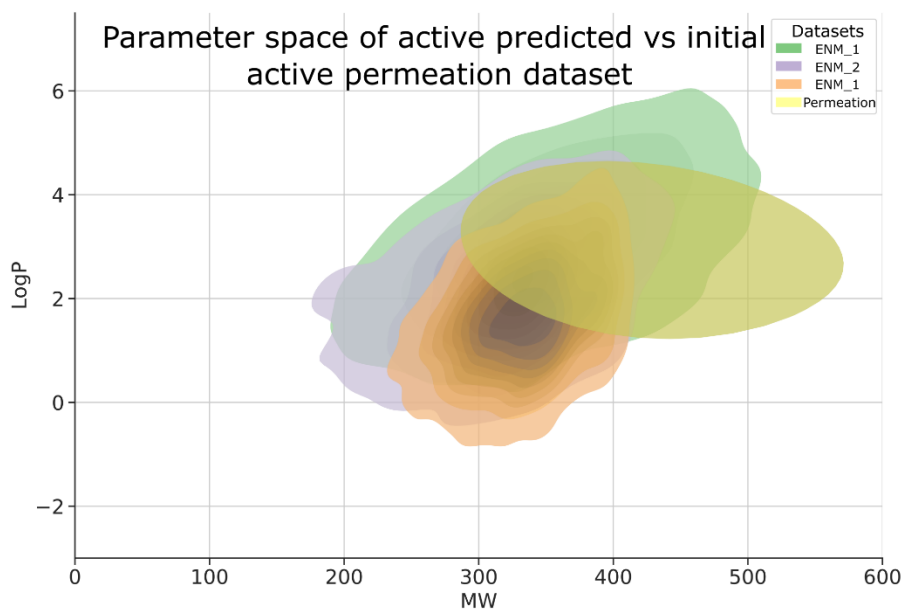

Fig. S1: Chemical space, represented by LogP and MW parameters, for three datasets: ENM\_1--ENM\_3 used to predict permeation compared to the initial permeation dataset (GN-actives only).

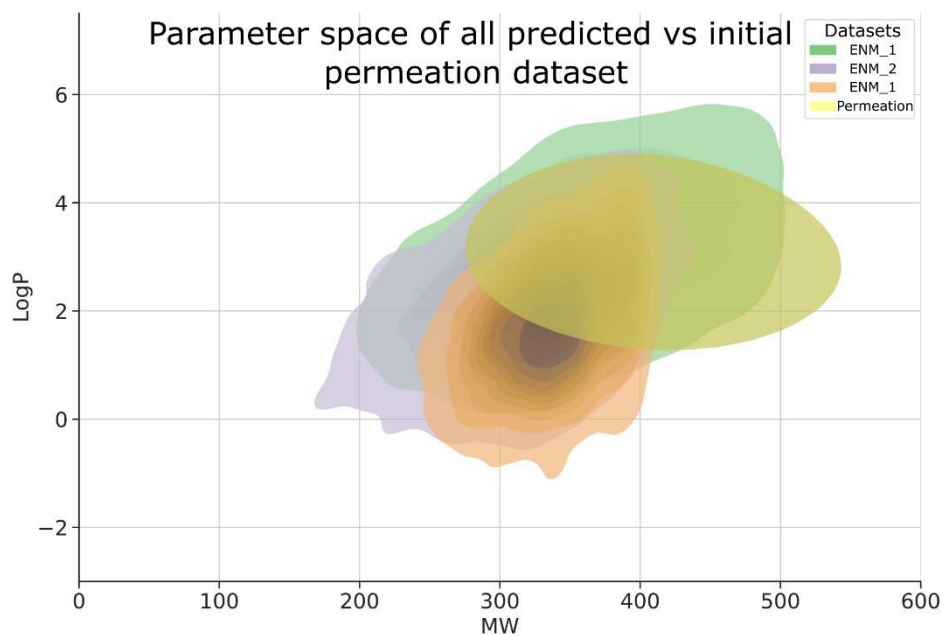

Fig. S2: Chemical space, represented by LogP and MW parameters, for three datasets: ENM\_1--ENM\_3 used to predict permeation compared to the initial permeation dataset (all data).

## Distributions of pMIC caused by transforms from Tab. 5

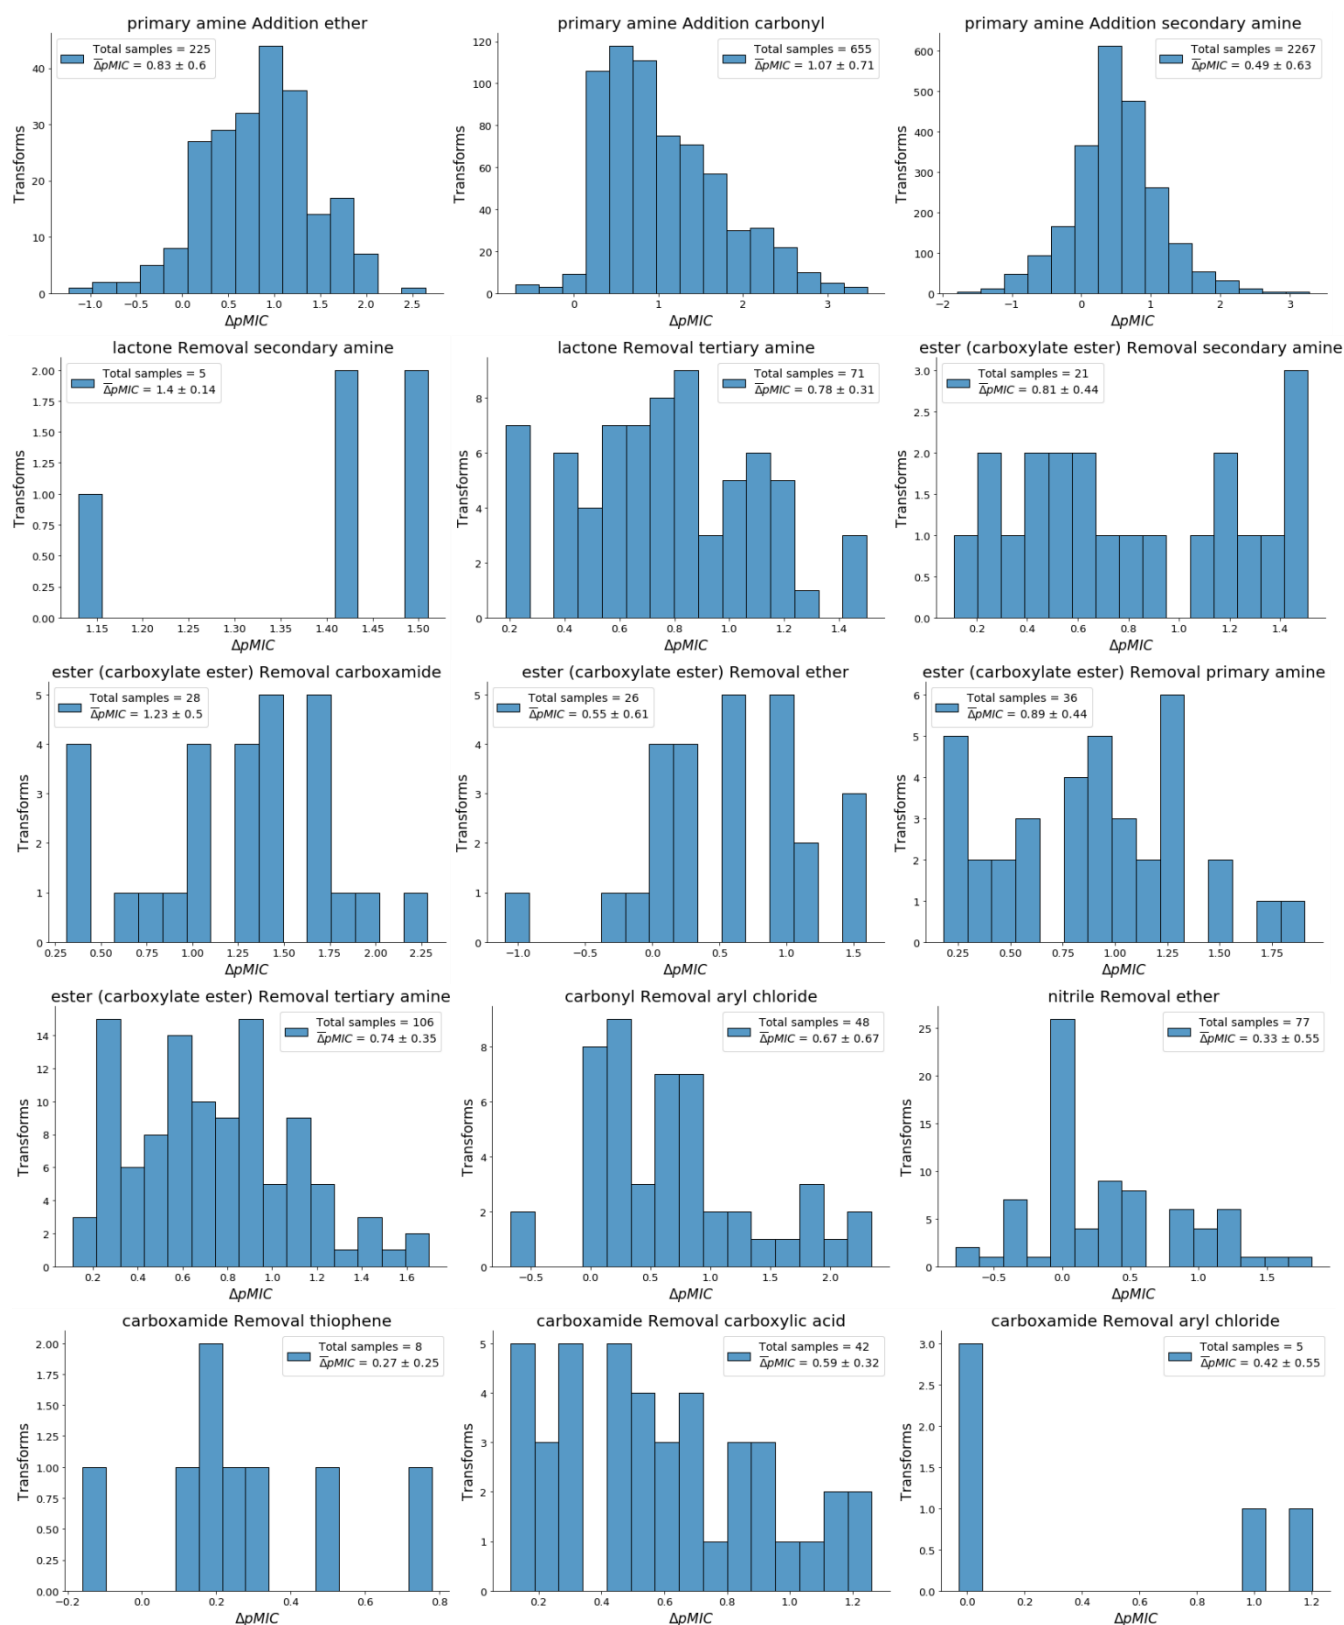

Fig. S3: Distributions of change in pMIC caused by every transform from Tab. 5. Histogram titles correspond to first three columns of Tab. 5: 'Main Moiety', '±', 'Exchange Moiety' for every transform. (part 1)

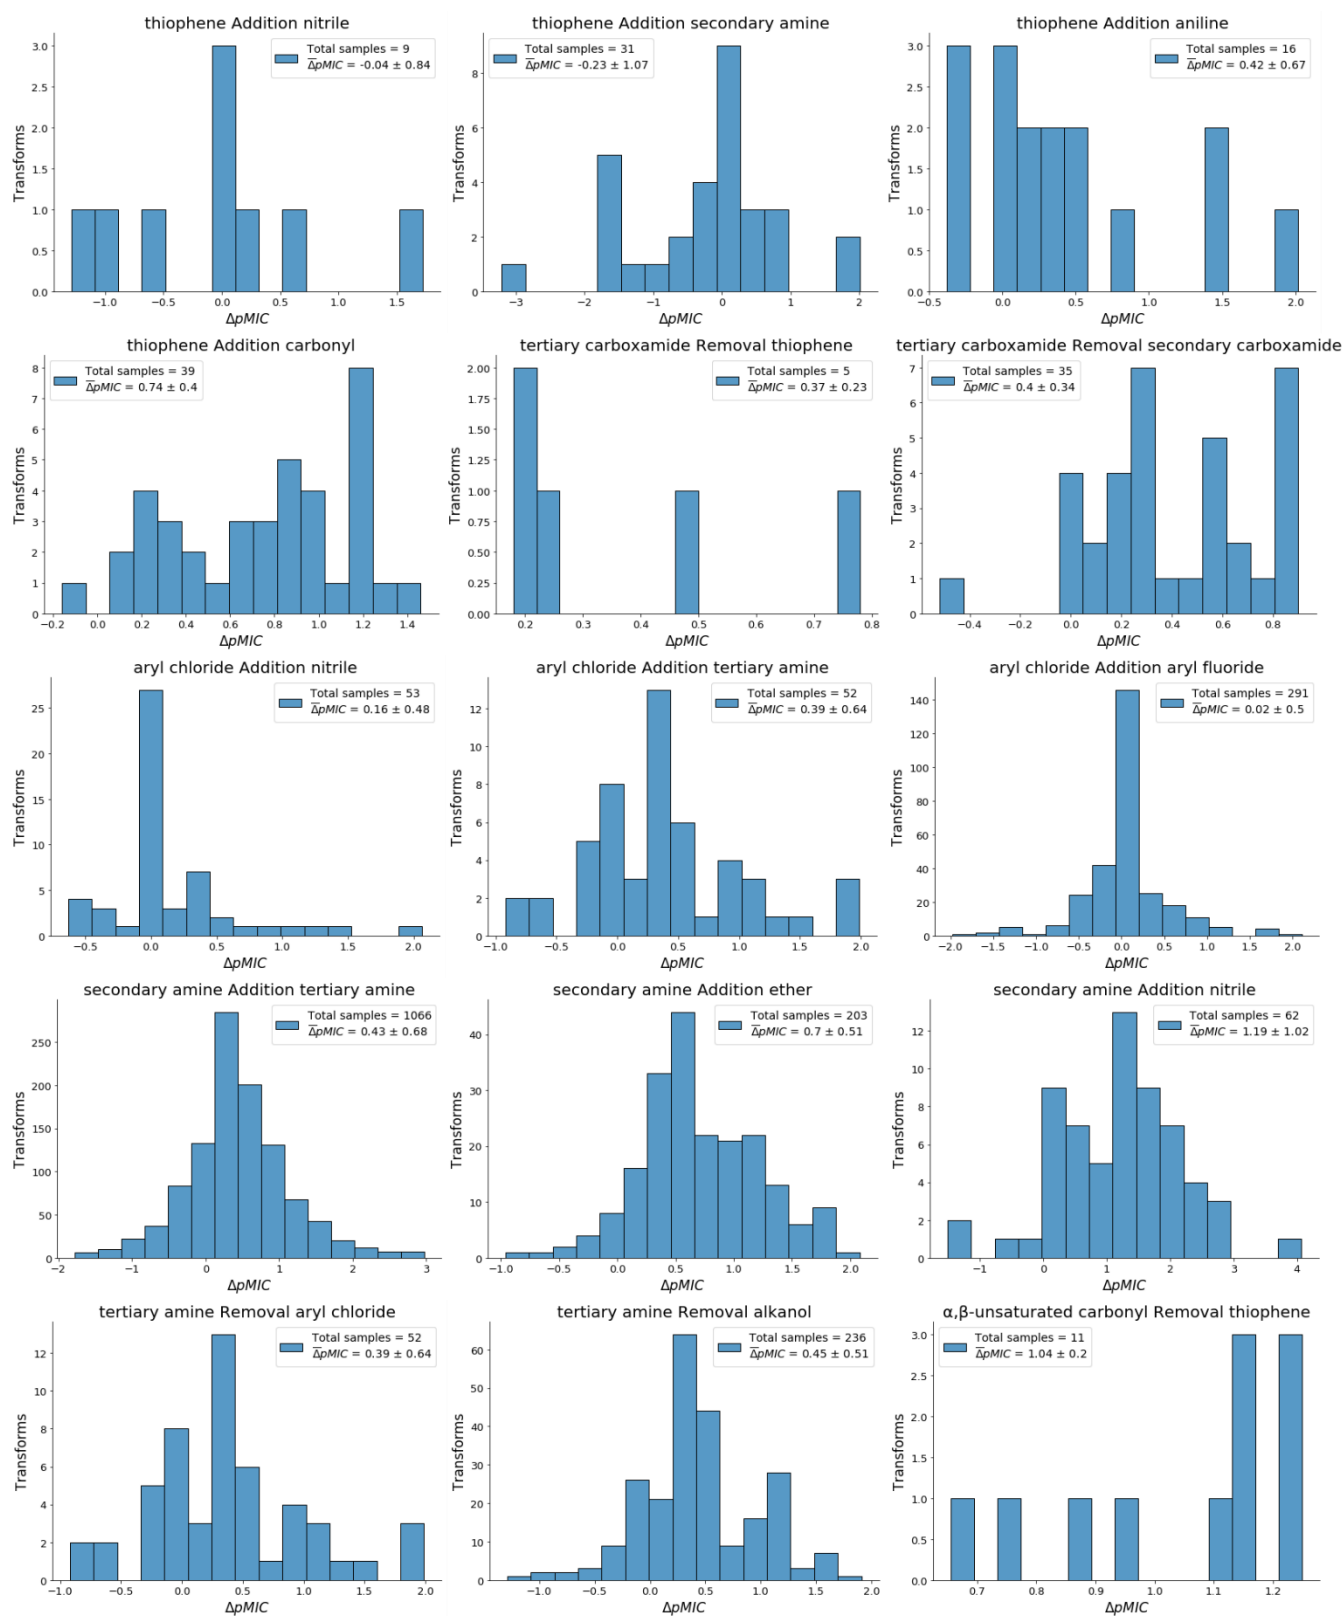

Fig. S3: Distributions of change in pMIC caused by every transform from Tab. 5. Histogram titles correspond to first three columns of Tab. 5: 'Main Moiety', '±', 'Exchange Moiety' for every transform. (part 2)

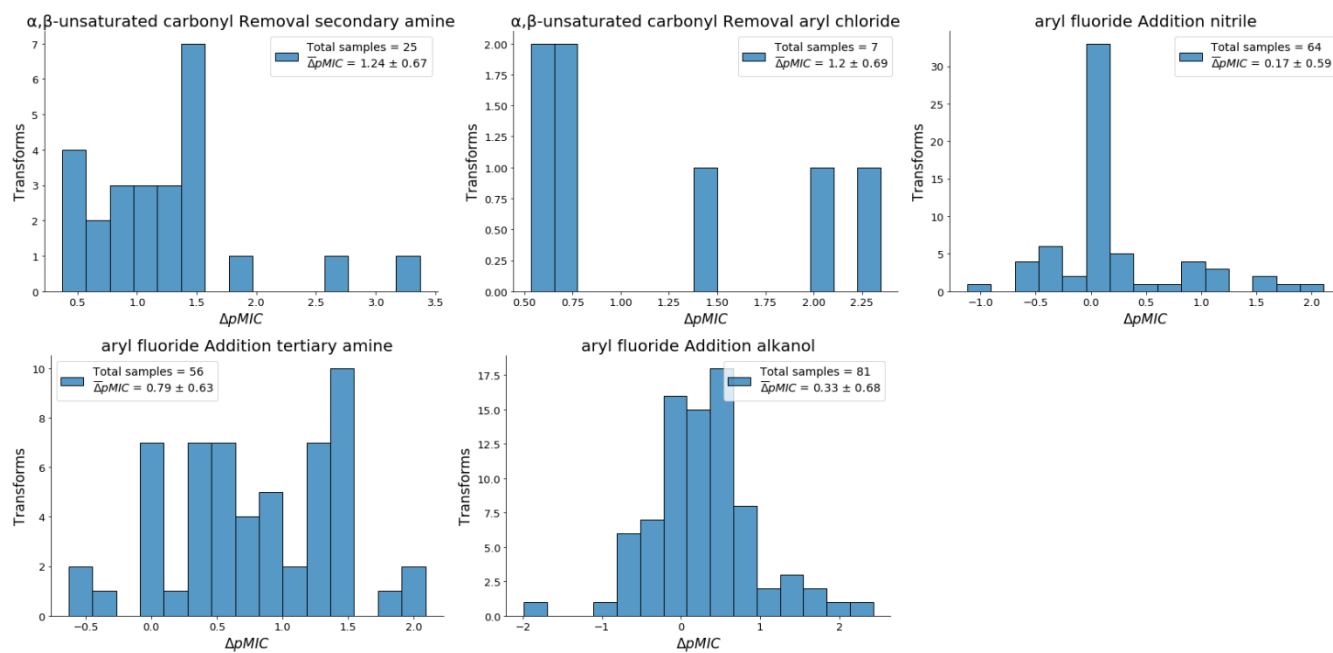

Fig. S3: Distributions of change in pMIC caused by every transform from Tab. 5. Histogram titles correspond to first three columns of Tab. 5: 'Main Moiety', '±', 'Exchange Moiety' for every transform. (part 3)
